# Supplementary material for: Construction of novel Ag/HKUST-1/g-C3N4 towards enhanced photocatalytic activity for the degradation of pollutants under visible light
Source: Royal Society of Chemistry journal article supplement (doi:10.1039/c9ra08489d), 2019-01-01
Supplement: c9ra08489d1.pdf [file c9ra08489d1.pdf]

## Supporting Information

### Construction of Novel Ag/HKUST-1/g-C<sub>3</sub>N<sub>4</sub> Towards to Enhanced Photocatalytic Activity in Degradation of Pollutants under Visible Light

Yu Qiao, Qian Han, Dong Li, Hongji Li, Bing Wei, Guangbo Che\*, Wei Jiang, Weisheng Guan\*

**Synthesis of 5.0% Ag/g-C<sub>3</sub>N<sub>4</sub>.** The as-prepared a certain amount of g-C<sub>3</sub>N<sub>4</sub> was mixed with 200 mL of deionized water by ultrasonication for 30 min. Then, 1.0 mL of 5% polyethylene glycol (PEG) 800 solution was added and the dispersion was stirred for another 10 min. For deposition of silver on the surface of g-C<sub>3</sub>N<sub>4</sub>, a photo-deposition technique was applied as follows: 5.0 mL of AgNO<sub>3</sub> solution (0.046 mol/L) was added to the dispersion. Then the suspension was transferred to a water-cooled reactor (250 mL) and irradiated under a PLS-SXE300 Xe lamp with 250 W illumination intensity for 60 min. The theoretical value of Ag loading amount was 5.0 wt %.

Table S1 Physical properties of pure g-C<sub>3</sub>N<sub>4</sub>, and 5% AHC.

| Sample                               | S <sub>BET</sub><br>(m <sup>2</sup> ·g <sup>-1</sup> ) | Total pore volume<br>(cm <sup>3</sup> ·g <sup>-1</sup> ) |
|--------------------------------------|--------------------------------------------------------|----------------------------------------------------------|
| pure g-C <sub>3</sub> N <sub>4</sub> | 10.4                                                   | 0.08                                                     |
| 5% AHC                               | 27.4                                                   | 0.12                                                     |

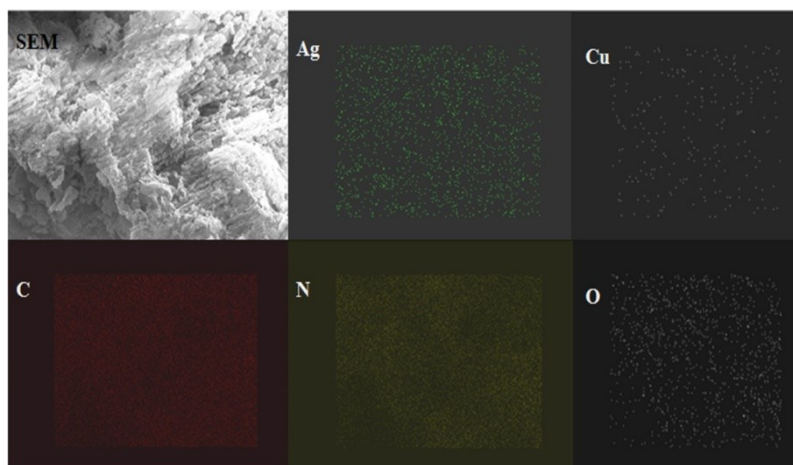

Fig. S1 SEM image of 5% AHC and corresponding EDS mapping images for rectangle area.

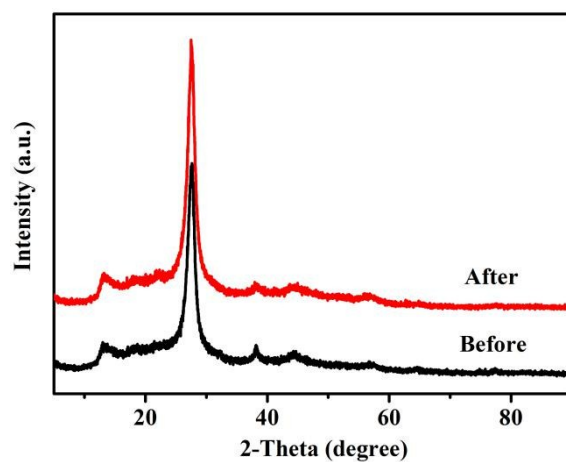

**Fig. S2** XRD patterns of 5% AHC before and after photocatalytic reaction.

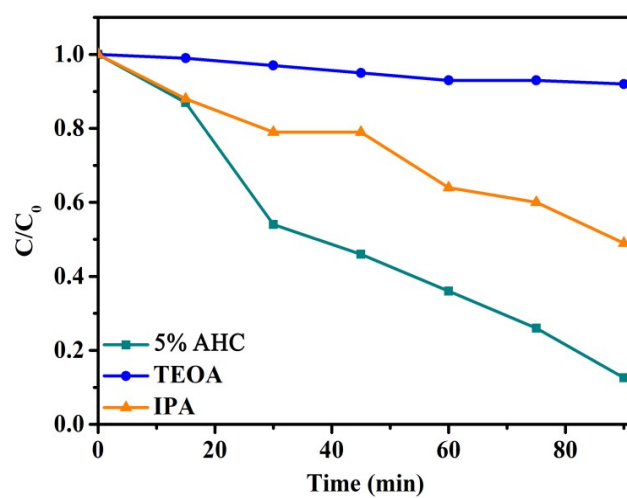

**Fig. S3** Trapping experiments of different scavengers on degradation of Rh B over 5% AHC.
